# Supplementary material
Source: PubMed Central journal article supplement (PMC3223841)
Supplement: JCI57324sd.pdf [file JCI57324sd.pdf]

**I. *Aadc* conditional targeting vector**

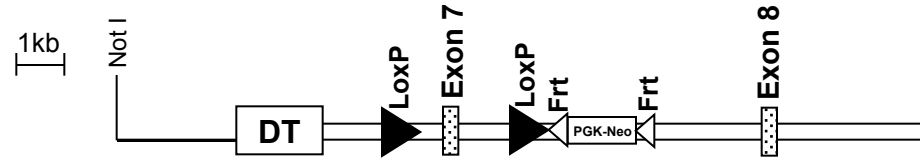

**II. *Aadc* homologous recombination (*Neo<sup>flrt</sup>; Aadc<sup>lox7</sup>*)**

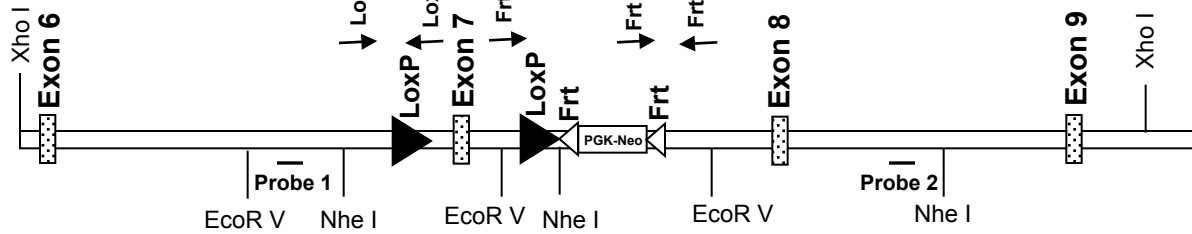

**III. Flpe-mediated excision of *Neo* cassette (*Aadc<sup>lox7</sup>*)**

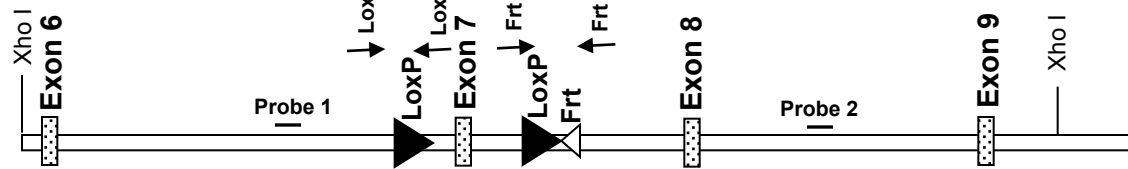

**VI. Cre-mediated excision of exon 7 in *Aadc* (*Aadc<sup>Δ7</sup>*)**

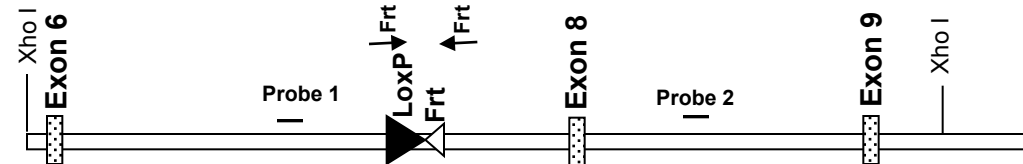

**Probe 1:** Wildtype *EcoR V* 5.5-kb fragment

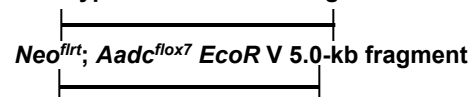

**Probe 2:** Wildtype *Nhe I* 8.8-kb fragment

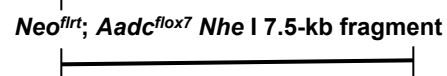

**Figure S1**

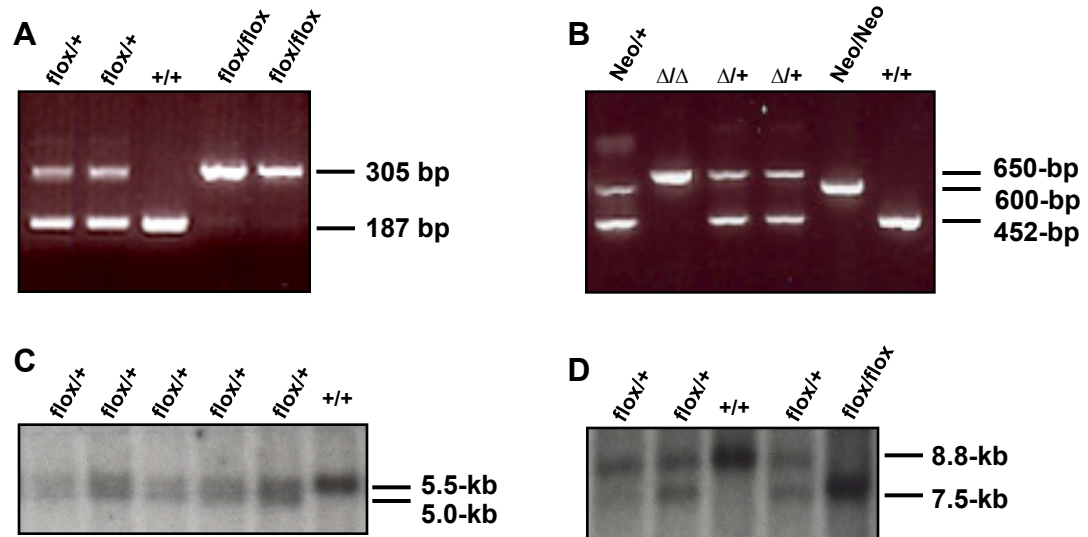

**Figure S2**

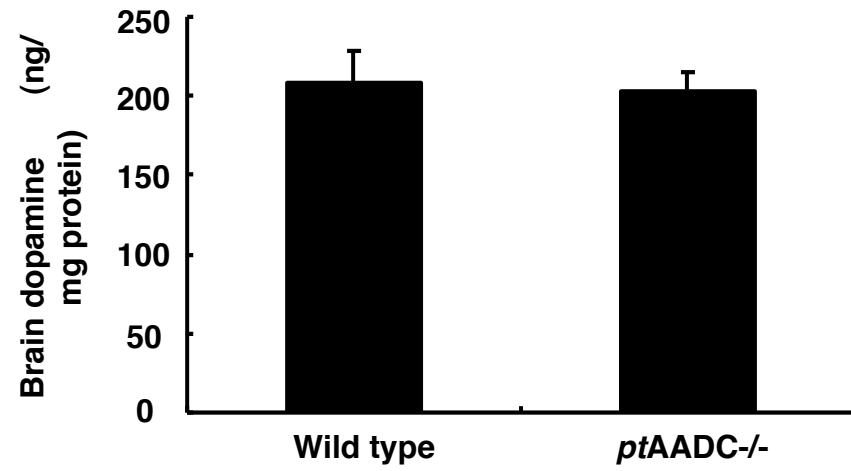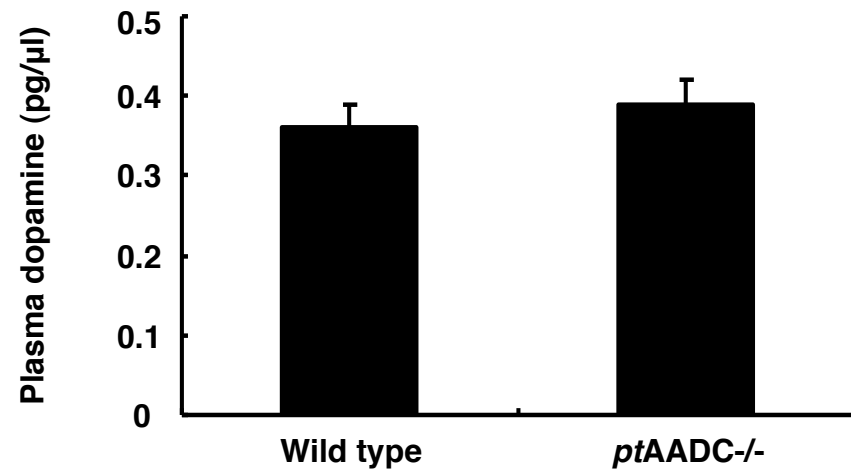

Figure S3

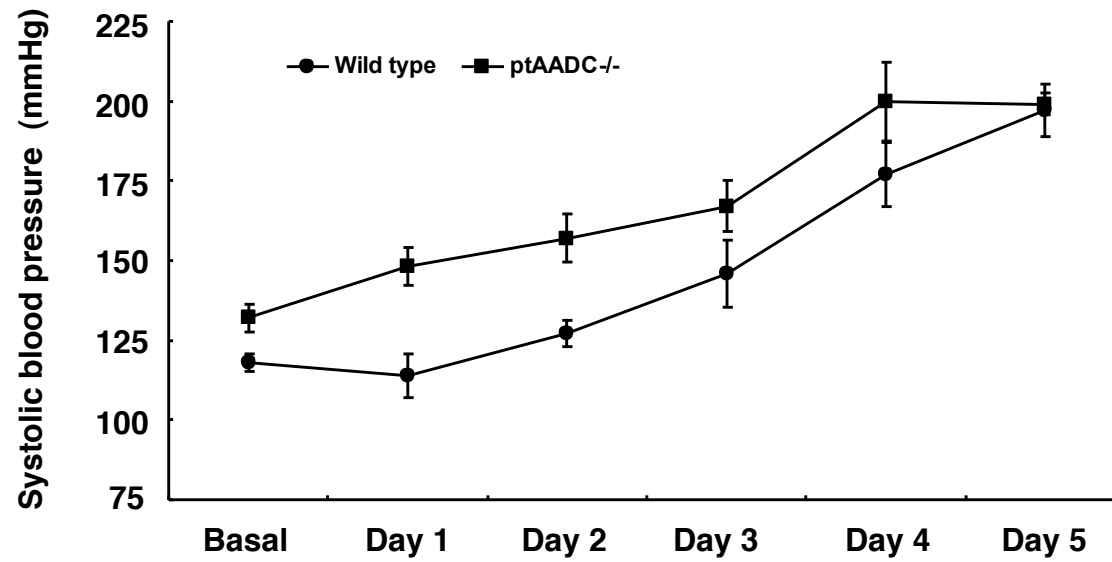

Figure S4

**A**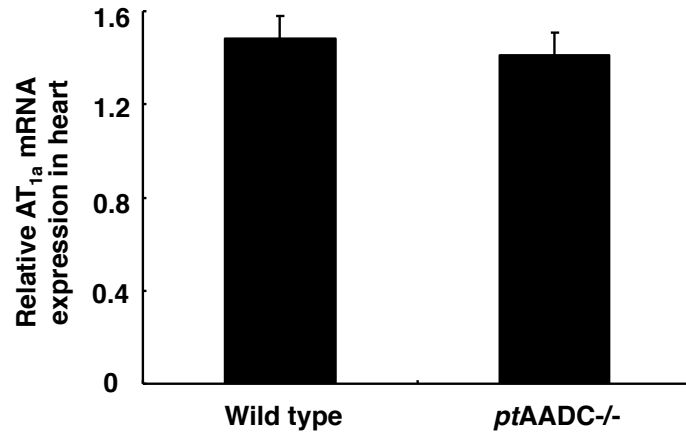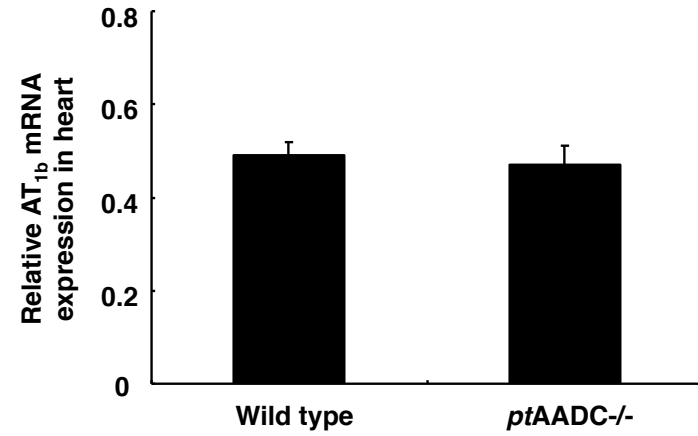**B**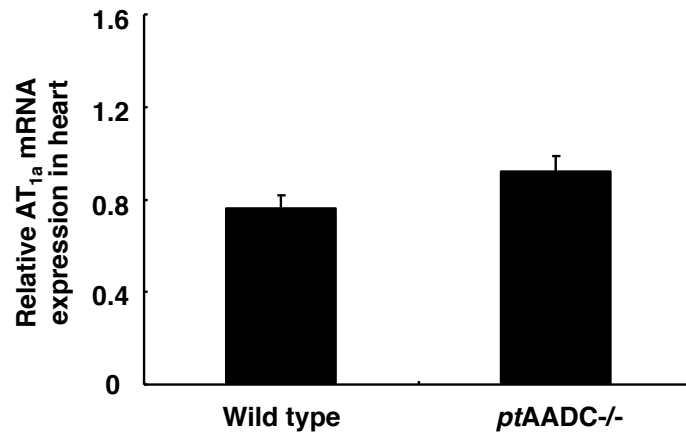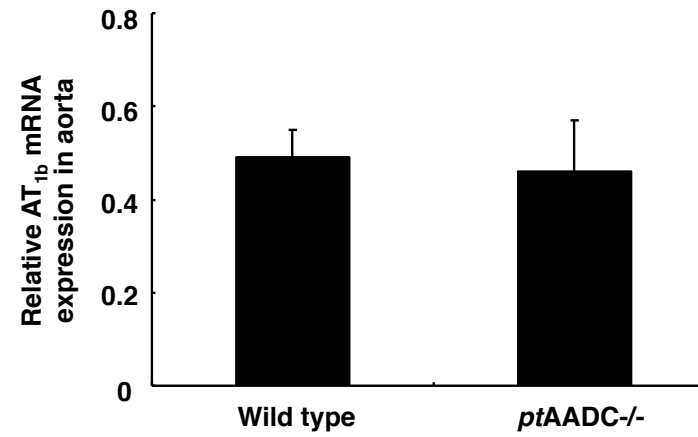**Figure S5**

**A: aorta**

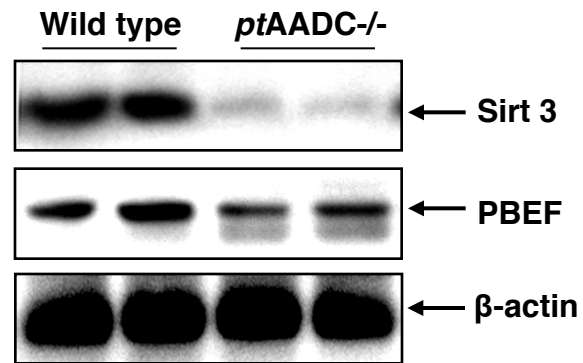

**B: heart**

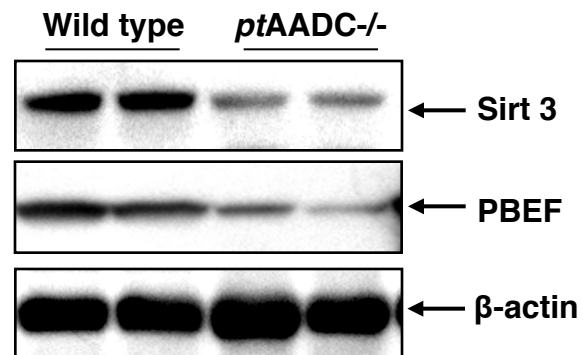

**C: liver**

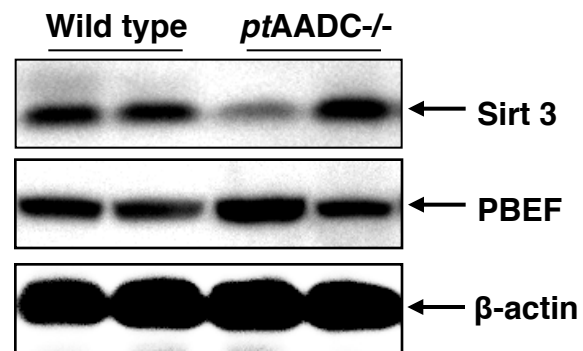

**Figure S6**
